# Supplementary material for: Glutaredoxin GRXS13 plays a key role in protection against photooxidative stress in Arabidopsis
Source: PubMed Central journal article supplement — J Exp Bot. 2011 Sep 30;63(1):503–15. doi: 10.1093/jxb/err301 (PMC3245481; doi:10.1093/jxb/err301), 2011-09-30
Supplement: supp_err301_00067041_file001.pdf [file supp_err301_00067041_file001.pdf]

# Glutaredoxin GRXS13 plays a key role in protection to photooxidative stress in Arabidopsis

Daniel Laporte, Ema Olate, Paula Salinas, Marcela Salazar, Xavier Jordana and Loreto Holuigue

## Supplementary Material

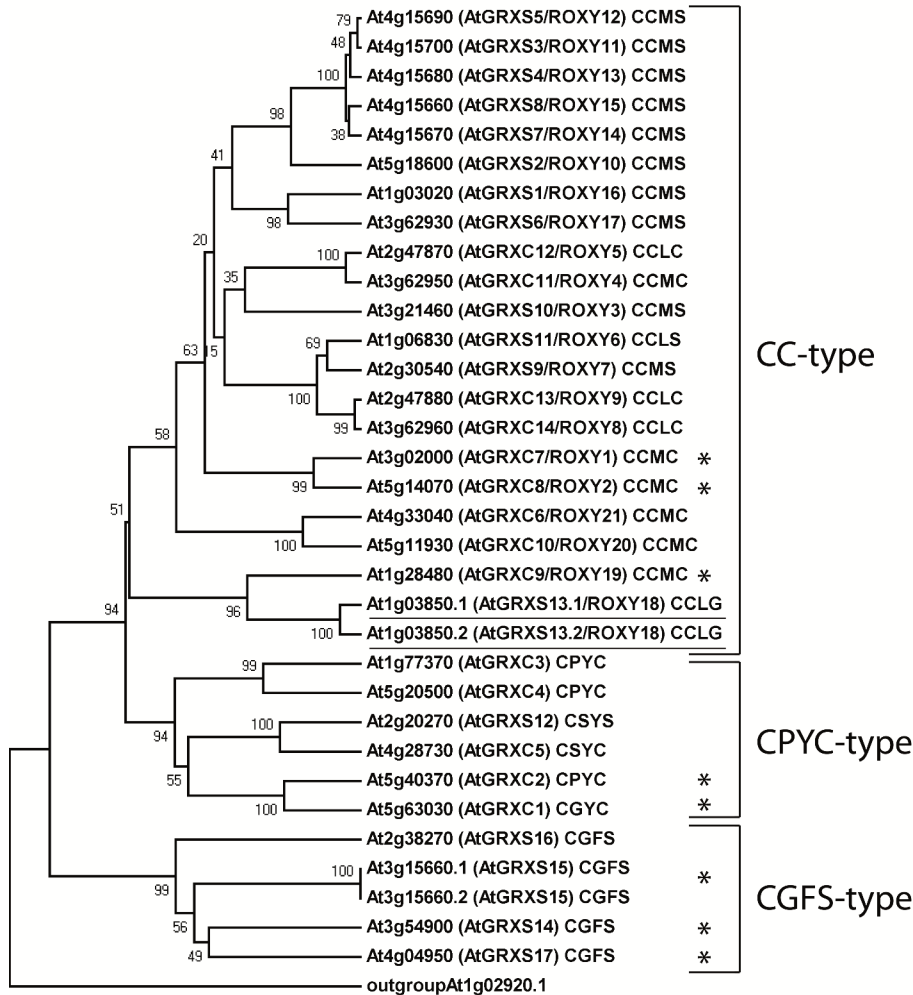

**Figure S1. Phylogenetic relationship and classification of the 31 GRXs from Arabidopsis.** The hierarchical cluster analysis of the 31 GRXs predicted in Arabidopsis was performed with the full-length deduced protein sequences obtained from TAIR ([www.arabidopsis.org](http://www.arabidopsis.org)) using the CLUSTAL W software for sequence alignment (<http://www.ebi.ac.uk/Tools/clustalw2/index.html>). Cladogram was built according to the maximum parsimony algorithm with a bootstrap of 500 iterations. The Arabidopsis thioredoxin gene At1g02920.1 was used as an external group. Clusters of CC-type, CPYC-type and CGFS-type GRX are separated by square brackets. The Arabidopsis Genome Initiative code, the assigned names (between brackets) and the four active-site aminoacids, are indicated for each gene. GRX genes are named according to GRXS/GRXC classification and to ROXY classification for the CC-type (Li et al., 2009). *GRXS13.1* and *GRXS13.2* variant genes are underlined and glutaredoxins previously characterized by genetic approaches are indicated by an asterisk (\*).

| <b>Target Gene</b>                        | <b>Forward Primer</b>      | <b>Reverse Primer</b>       |
|-------------------------------------------|----------------------------|-----------------------------|
| <b>At1g03850.1</b><br>( <i>GRXS13.1</i> ) | CCTCCGCTCAAATCTTACGG       | CTTTTCGTAACCTAGTCGG         |
| <b>At1g03850.2</b><br>( <i>GRXS13.2</i> ) | CAGTGGTGGTTGAGATTGGTGAAG   | AGTGCCTACTCTTAGACAAGCTGG    |
| <b>At4g24550</b><br>( <i>Clathrin</i> )   | AGCACCGGGTTCTAACTCAA       | AATACGCGCTGAGTTCCTT         |
| <b>At5g06290</b><br>( <i>YLS8</i> )       | TTACTGTTTCGGTTGTTCTCCATT   | CACTGAATCATGTTCGAAGCAAGT    |
| <b>At4g05320</b><br>( <i>UBQ10</i> )      | GGCCTTGATAATCCCTGATGAATAAG | AAAGAGATAACAGGAACGGAAACATAG |
| <b>At1g02840</b><br>( <i>GRXC9</i> )      | CCTACATAAACCGCCGGT         | GAGGCTGCTTCTTGGACTION       |
| <b>At1g02930</b><br>( <i>GST-1</i> )      | TAATAAAAAGTGGCGACC         | ACATTCAAATCAAACACTCG        |

**Table S1.** Primers used to quantify transcripts from the indicated genes by qRT-PCR.

| <b>Gene variant</b> | <b>ESTs</b>                                                                                                                                                                                                                                                                                                                                                                                                 | <b>FL-cDNAs</b>                               |
|---------------------|-------------------------------------------------------------------------------------------------------------------------------------------------------------------------------------------------------------------------------------------------------------------------------------------------------------------------------------------------------------------------------------------------------------|-----------------------------------------------|
| <b>At1g03850.1</b>  | EBENXNS02JCUQX<br>RAFL14-01-M01 (3`)<br>RAFL14-01-M01 (5`)                                                                                                                                                                                                                                                                                                                                                  | U22510                                        |
| <b>At1g03850.2</b>  | 06c01 (3`)<br>07E02 (3`)<br>1025557 (5`)<br>271253 (3`)<br>271253 (5`)<br>27F7 (3`)<br>39H8 (3`)<br>EB3RODY01AW7JM<br>EB3RODY01DG3Y4<br>EB3RODY01DVA3R<br>EB3RODY01E2936<br>EB3RODY02HOI1F<br>EBENXNS02H8O7Y<br>EBENXNS02JP95O<br>EBENXNS02JS5FE<br>MPIZP200III83Q (5`)<br>RAFL04-13-K21 (3`)<br>RAFL04-13-K21 (5`)<br>RAFL15-03-F10 (3`)<br>RAFL15-03-F10 (5`)<br>RAFL16-63-C05 (3`)<br>RAFL19-43-J01 (3`) | R09778<br>U09778<br>AY086732<br>GSLTPGH52ZE12 |

**Table S2.** Evidence of expression for *GRXS13* gene variants in Arabidopsis databases. ESTs and FL-cDNAs associated to *GRXS13* gene (At1g03850) were obtained from TAIR database (<http://www.arabidopsis.org/cgi-bin/gbrowse/arabidopsis/>) and analyzed for variant correspondence. Twenty two out of the 25 ESTs (88%) and 4 out of the 5 FL-cDNAs (80%) corresponded to the *GRXS13.2*(At1g03850.2) variant.
